# Supplementary material for: The Inhibitory Effect of Natural Products on Protein Fibrillation May Be Caused by Degradation Products – A Study Using Aloin and Insulin
Source: PLOS journal article supplement (doi:10.1371/journal.pone.0149148), 2016-02-16
Supplement: S3 (10.1371/journal.pone.0149148.s003) [file journal.pone.0149148.s003]

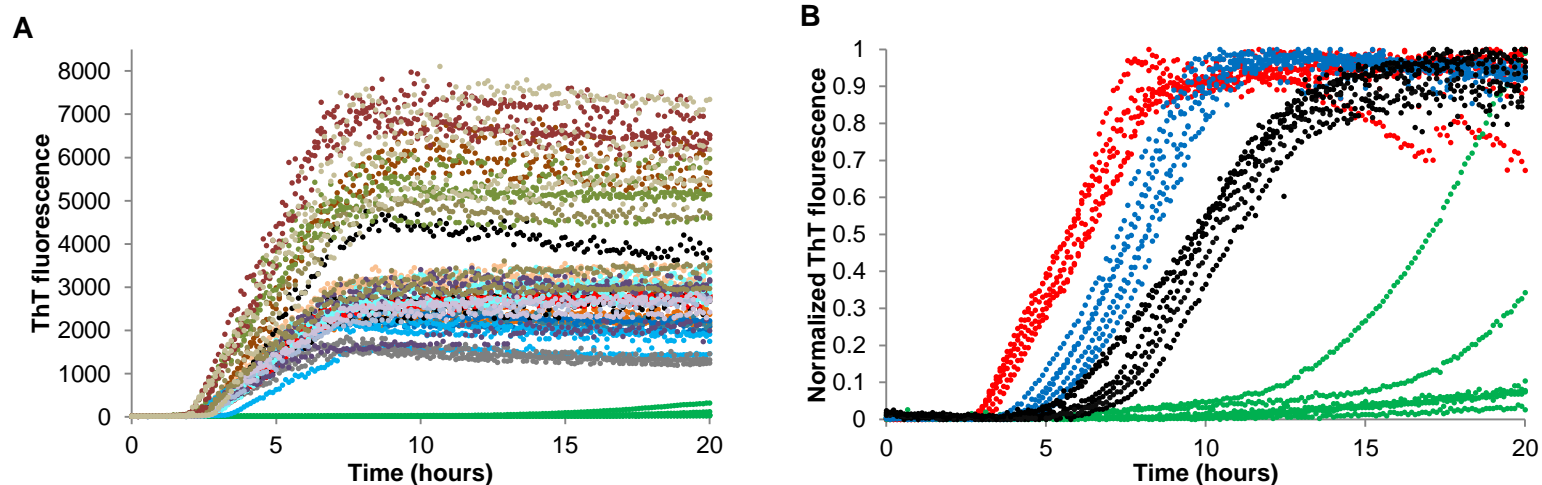

**Fig S3. Fractionation of aged aloin.** (A) Fibrillation curves of 1 mg/mL (172  $\mu$ M) insulin in the presence of 400  $\mu$ M 2 weeks old aloin (green) or fractions hereof. Fibrillation conditions: ThT assay, pH 7.4. (B) Activity of processed aloin. Normalized fibrillation curves of insulin in the presence of 0.4 % EtOH (red), 400  $\mu$ M 2 weeks old aloin (green), dried and reconstituted 400  $\mu$ M 2 weeks old aloin (blue), 400  $\mu$ M fractionated, pooled, dried and reconstituted 2 weeks old aloin (black). Fibrillation conditions: pH 7.4.
