# Supplementary material for: The Inhibitory Effect of Natural Products on Protein Fibrillation May Be Caused by Degradation Products – A Study Using Aloin and Insulin
Source: PLOS journal article supplement (doi:10.1371/journal.pone.0149148), 2016-02-16
Supplement: S6 (10.1371/journal.pone.0149148.s006) [file journal.pone.0149148.s006]

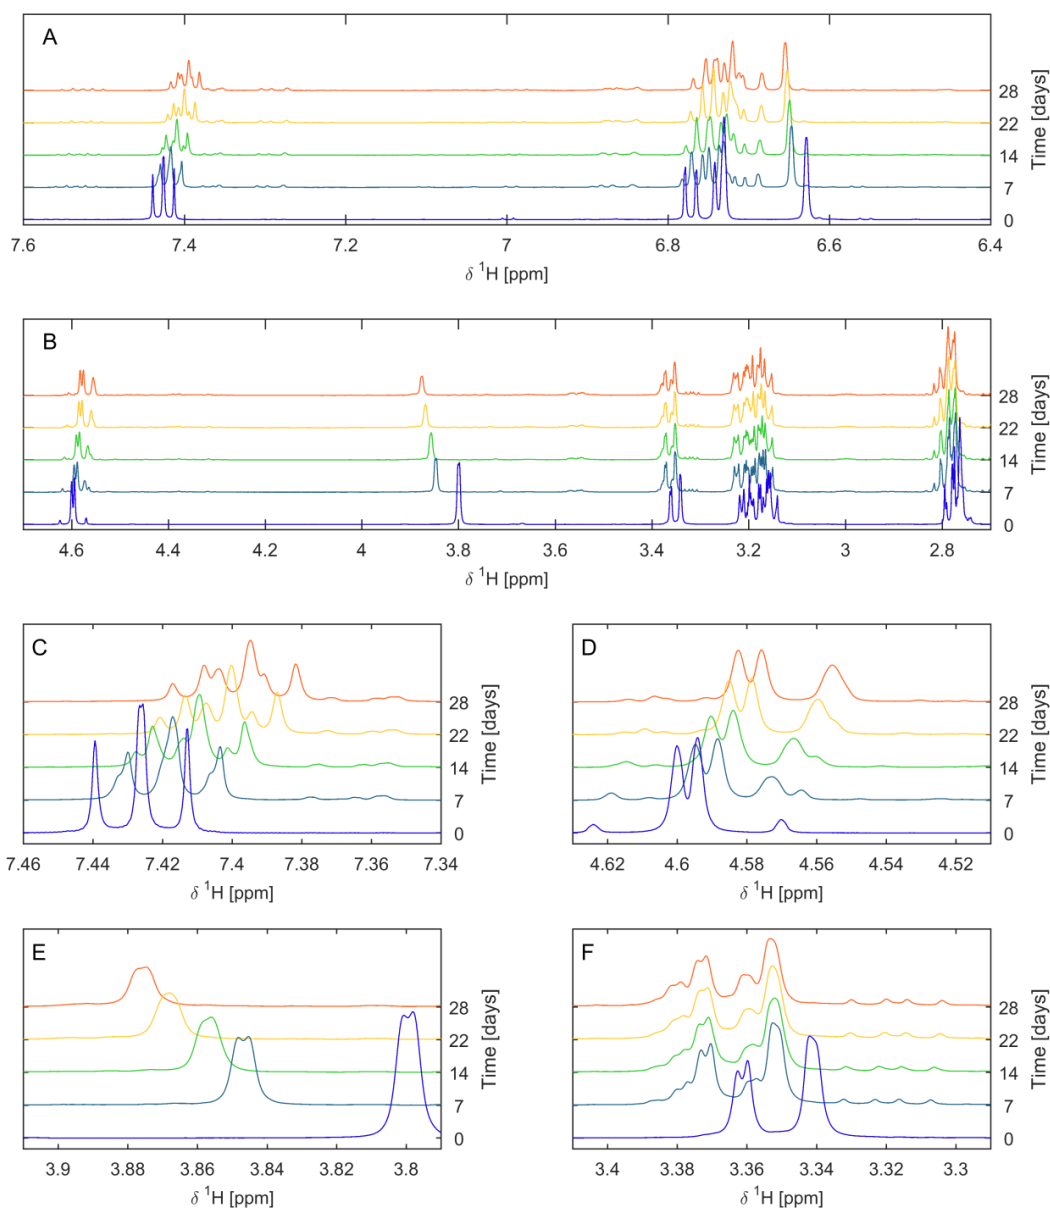

**S6 Fig.  $^1\text{H}$  NMR-spectra.**  $^1\text{H}$  NMR-spectra (300 K, 600 MHz) of aloin dissolved in methanol- $d_4$  and  $\text{D}_2\text{O}$  (1:4) during four weeks of storage at room temperature. (A) 6.4-7.6 ppm (aromatic protons), (B) 2.7-4.7 ppm (non-aromatic protons), (C)  $7.40 \pm 0.06$  ppm (H-6), (D)  $4.57 \pm 0.06$  ppm (H-11a and H-11b,  $\text{CH}_2$ -group). (E)

3.85±0.06 ppm (H-10). (F) 3.35±0.06 ppm (H-6', low field signal of the diastereotopic protons in the CH<sub>2</sub>-group of glucose). Spectra were calibrated to the (suppressed) water signal set to 4.70 ppm and normalized to the range 6.2 – 7.7 ppm (all aromatic signals).
